# Supplementary material for: Synthesis of hierarchical Bi2O3/Bi4Ti3O12 p–n junction nanoribbons on carbon fibers from (001) facet dominated TiO2 nanosheets
Source: Royal Society of Chemistry journal article supplement (doi:10.1039/c4ra10587g), 2014-01-01
Supplement: c4ra10587g1.pdf [file c4ra10587g1.pdf]

# Synthesis of Hierarchical $\text{Bi}_2\text{O}_3/\text{Bi}_4\text{Ti}_3\text{O}_{12}$ p-n Junction Nanoribbons on Carbon Fibers from (001) Facets Dominated $\text{TiO}_2$ Nanosheets

Baicheng Weng<sup>\*,1</sup>, Fenghua Xu<sup>1</sup>, Jianguang Xu

Materials Engineering Department, Yancheng Institute of Technology, 9 Xiwang Avenue, Yancheng, Jiangsu Province, 224051, China

\*Corresponding Author: [baichengweng@gmail.com](mailto:baichengweng@gmail.com)

<sup>1</sup>These authors contributed equally to this work.

## Supporting information:

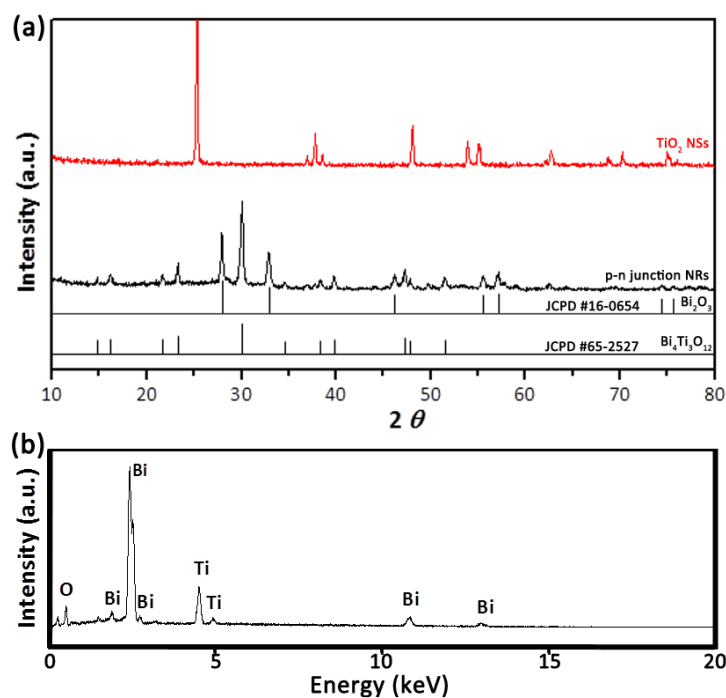

**Figure S1.** (a) XRD patterns of  $\text{Bi}_2\text{O}_3/\text{Bi}_4\text{Ti}_3\text{O}_{12}$  p-n junction NRs on CFs and the precursor  $\text{TiO}_2$  NSs. (b) EDS pattern of  $\text{Bi}_2\text{O}_3/\text{Bi}_4\text{Ti}_3\text{O}_{12}$  p-n junction NRs on CFs. The standard XRD pattern of  $\text{Bi}_2\text{O}_3$  (JCPDS No. 16-0654) and  $\text{Bi}_4\text{Ti}_3\text{O}_{12}$  (JCPDS No. 65-2527) are also presented.

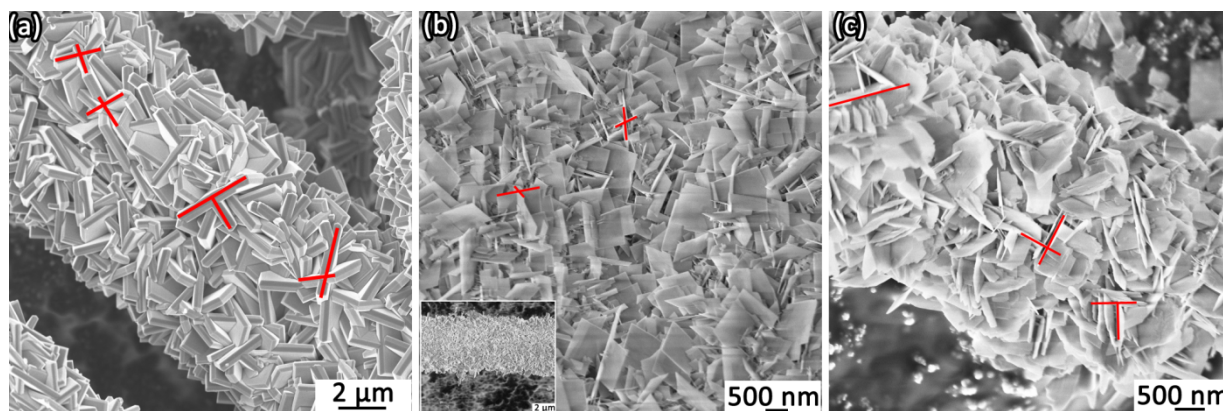

**Figure S2.** SEM images of CFs supported TiO<sub>2</sub> NSs precursor (a), the second step hydrothermal treatment of the precursor in the high pH bismuth aqueous solution for 3 h (b) and 10 h (c).

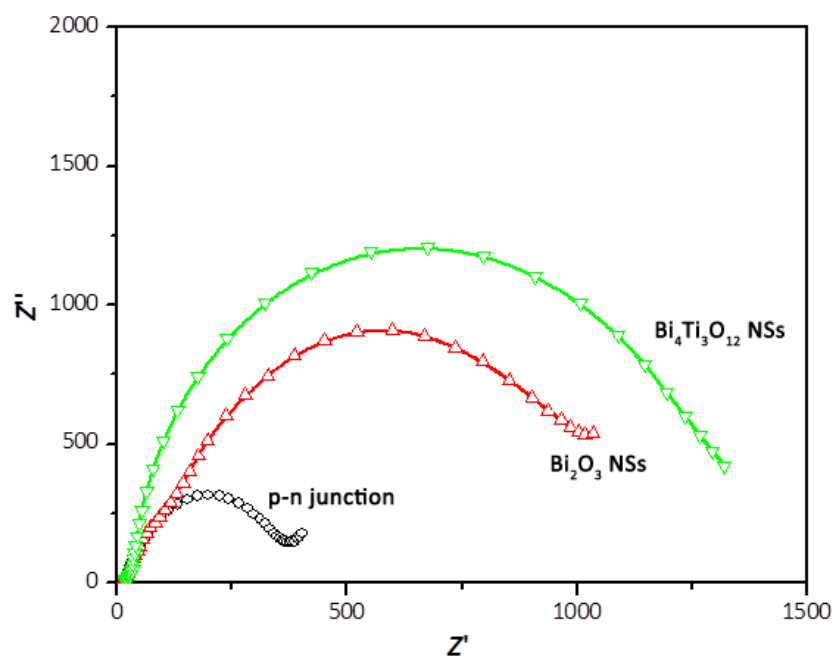

**Figure S3.** Nyquist plots of  $\text{Bi}_2\text{O}_3$  NSs,  $\text{Bi}_4\text{Ti}_3\text{O}_{12}$  NSs,  $\text{Bi}_2\text{O}_3/\text{Bi}_4\text{Ti}_3\text{O}_{12}$  p-n junction NRs.

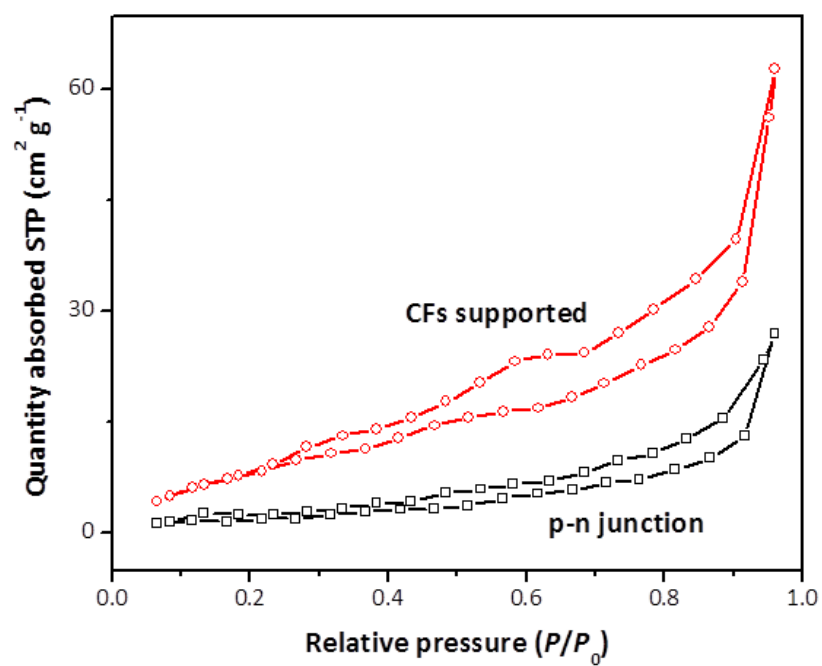

**Figure S4.** Isotherm curves of Bi<sub>2</sub>O<sub>3</sub>/Bi<sub>4</sub>Ti<sub>3</sub>O<sub>12</sub> p-n junction NRs and the hierarchical CFs supported Bi<sub>2</sub>O<sub>3</sub>/Bi<sub>4</sub>Ti<sub>3</sub>O<sub>12</sub> p-n junction NRs, respectively.
